# Supplementary material for: xQTLatlas: a comprehensive resource for human cellular-resolution multi-omics genetic regulatory landscape
Source: PubMed Central journal article supplement (PMC11701524; doi:10.1093/nar/gkae837), 2024-10-01
Supplement: gkae837_supplemental_file.pdf [file gkae837_supplemental_file.pdf]

# **Supplementary information**

**xQTLatlas: a comprehensive resource for human  
cellular-resolution multi-omics genetic regulatory  
landscape**

## Supplementary Figures

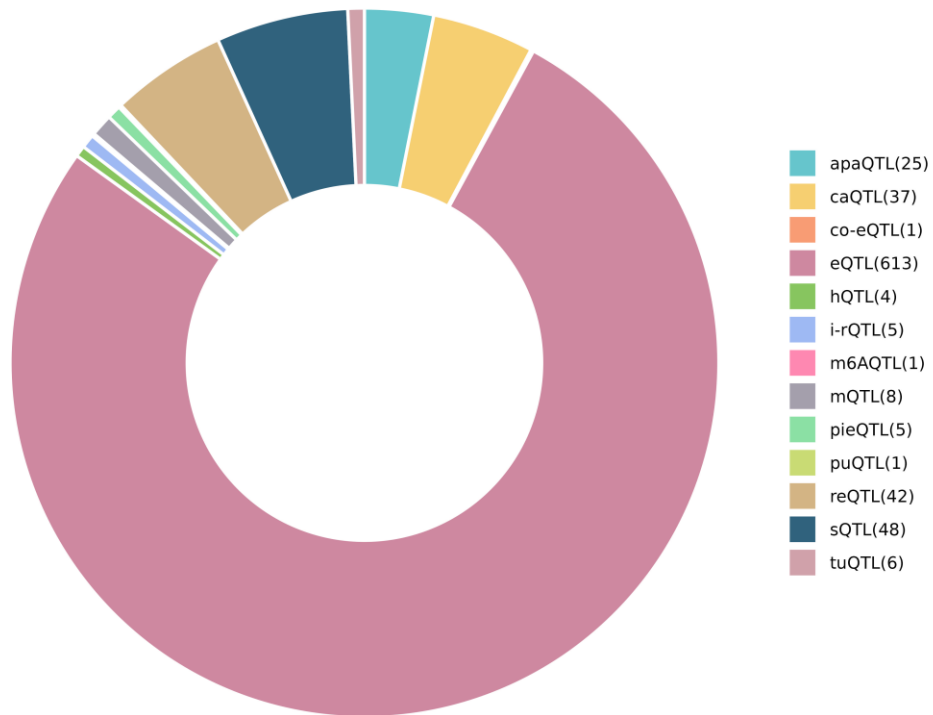

**Supplementary Figure S1.** Distribution of xQTLAtlas Datasets by Molecular Phenotype.

**A**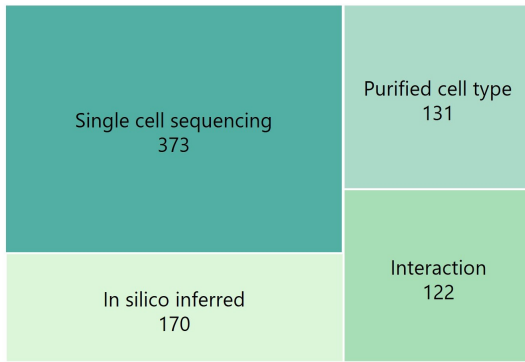**B**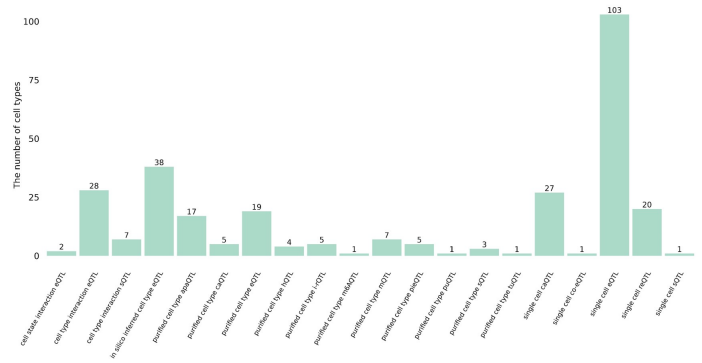

**Supplementary Figure S2.** The dataset distribution of xQTLAtlas . (A) The Treemap presents the breakdown of different xQTL discovery strategy datasets in xQTLAtlas. (B) The bar chart displays the number of cell types included in each xQTL type.

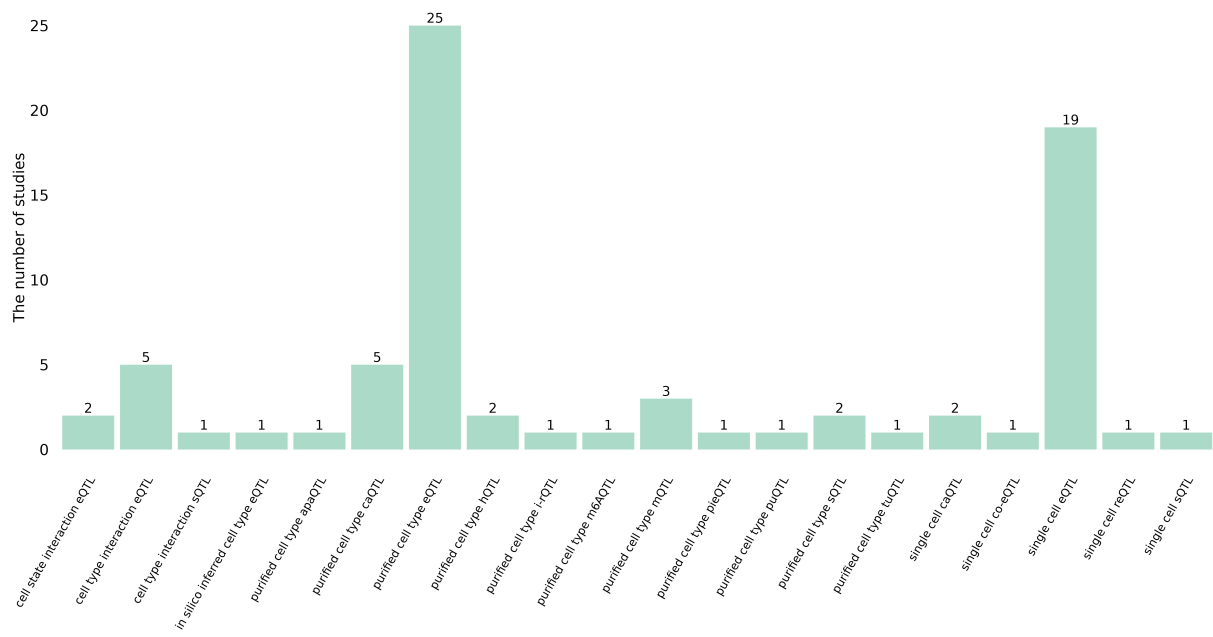

**Supplementary Figure S3.** The number of studies of different xQTL types in xQTLatlas.

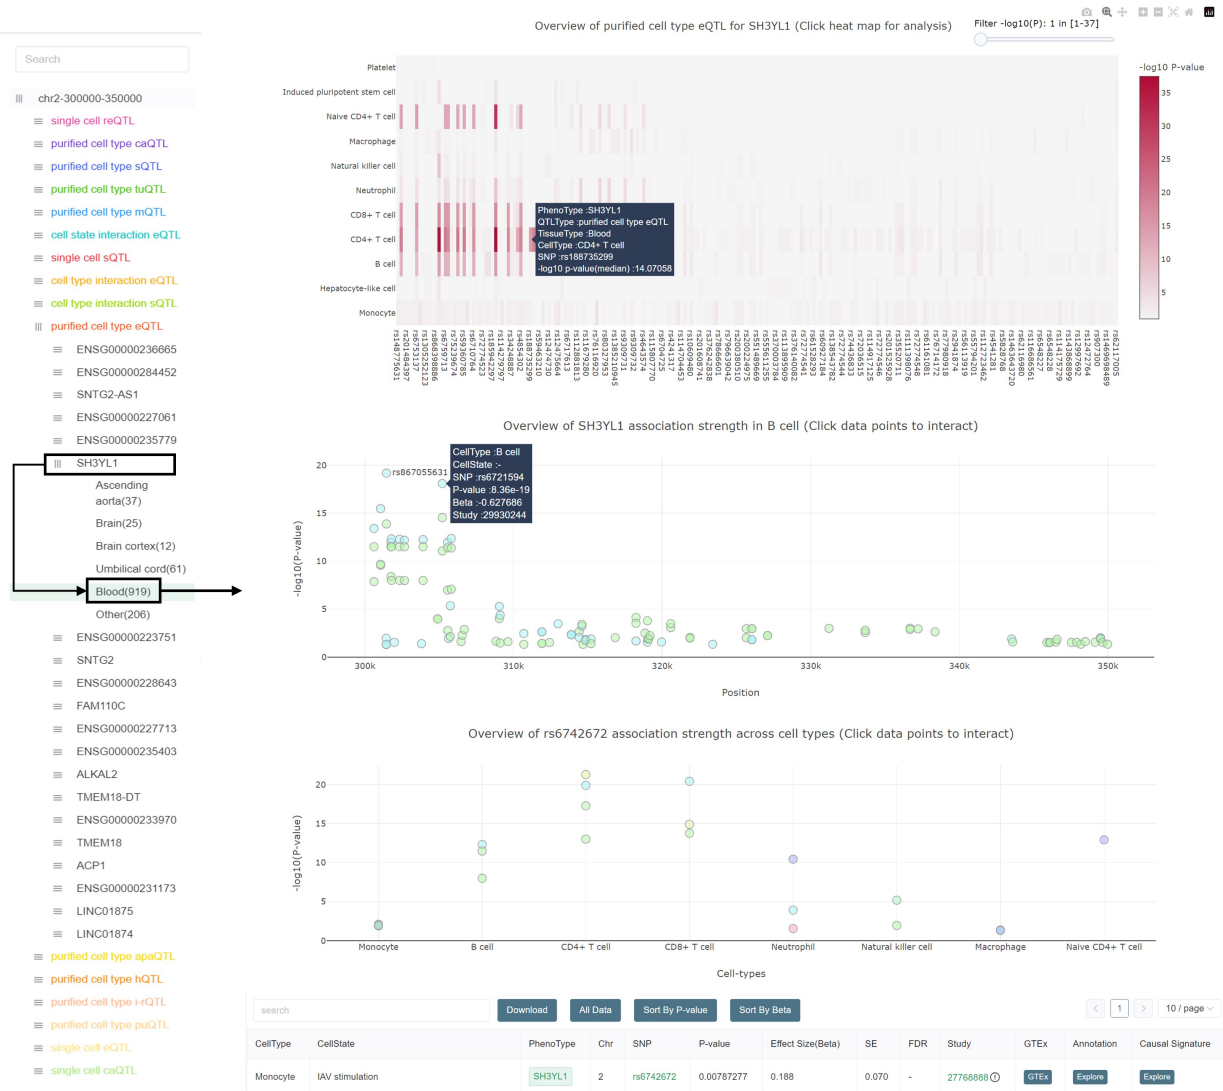

**Supplementary Figure S4.** Example of Region of Interest Exploration Mode.
